# Supplementary material for: Differential associations of physical job demands with cognitive impairment in Korean workers aged 45 and older: a 14-year longitudinal study using the Korean Longitudinal Study of Aging (KLoSA)
Source: HighWire-hosted journal article supplement (doi:10.1136/bmjopen-2024-088000), 2024-10-01
Supplement: bmjopen-2024-088000supp001_data_supplement.pdf [file bmjopen-2024-088000supp001_data_supplement.pdf]

Supplementary material

Supplementary table 1. Weighted Characteristics of Study Participants by Physical Job Demands<sup>a</sup> at Baseline (Wave 1)

|                                    | Total<br>( <i>n</i> = 2170) |                | Low PS<br>( <i>n</i> = 696) |               | High PS<br>( <i>n</i> = 1474) |                | Low LH<br>( <i>n</i> = 964) |               | High LH<br>( <i>n</i> = 1206) |                | Low BK<br>( <i>n</i> = 786) |               | High BK<br>( <i>n</i> = 1384) |                |
|------------------------------------|-----------------------------|----------------|-----------------------------|---------------|-------------------------------|----------------|-----------------------------|---------------|-------------------------------|----------------|-----------------------------|---------------|-------------------------------|----------------|
|                                    | Mean<br>(SD)                | <i>n</i> (%)   | Mean<br>(SD)                | <i>n</i> (%)  | Mean<br>(SD)                  | <i>n</i> (%)   | Mean<br>(SD)                | <i>n</i> (%)  | Mean<br>(SD)                  | <i>n</i> (%)   | Mean<br>(SD)                | <i>n</i> (%)  | Mean<br>(SD)                  | <i>n</i> (%)   |
| Age                                | 53.2<br>(6.6)               |                | 52.6<br>(5.8)               |               | 53.5<br>(6.9)                 |                | 52.6<br>(5.9)               |               | 53.7<br>(7.1)                 |                | 52.4<br>(5.7)               |               | 53.7<br>(7.1)                 |                |
| Sex (male)                         |                             | 1349<br>(66.5) |                             | 497<br>(74.1) |                               | 852<br>(62.5)  |                             | 638<br>(69.6) |                               | 711<br>(63.7)  |                             | 557<br>(74.0) |                               | 792<br>(61.5)  |
| Marital status<br>(married)        |                             | 1976<br>(91.0) |                             | 643<br>(92.1) |                               | 1333<br>(90.4) |                             | 885<br>(91.7) |                               | 1091<br>(90.4) |                             | 727<br>(92.0) |                               | 1249<br>(90.3) |
| Educational attainment             |                             |                |                             |               |                               |                |                             |               |                               |                |                             |               |                               |                |
| Elementary school<br>or below      |                             | 671<br>(22.6)  |                             | 95<br>(9.6)   |                               | 576<br>(29.5)  |                             | 171<br>(12.7) |                               | 500<br>(31.6)  |                             | 118<br>(10.9) |                               | 553<br>(30.4)  |
| Middle school                      |                             | 434<br>(18.8)  |                             | 121<br>(14.2) |                               | 313<br>(21.2)  |                             | 178<br>(15.9) |                               | 256<br>(21.5)  |                             | 130<br>(14.5) |                               | 304<br>(21.7)  |
| High school                        |                             | 781<br>(40.8)  |                             | 285<br>(41.1) |                               | 496<br>(40.6)  |                             | 388<br>(41.3) |                               | 393<br>(40.3)  |                             | 329<br>(42.4) |                               | 452<br>(39.7)  |
| College or above                   |                             | 284<br>(17.8)  |                             | 195<br>(35.1) |                               | 89<br>(8.7)    |                             | 227<br>(30.1) |                               | 57<br>(6.6)    |                             | 209<br>(32.2) |                               | 75<br>(8.2)    |
| Household income<br>(below median) |                             | 1243<br>(51.8) |                             | 328<br>(41.6) |                               | 915<br>(57.2)  |                             | 459<br>(42.8) |                               | 784<br>(60.0)  |                             | 367<br>(42.5) |                               | 876<br>(57.9)  |
| Residential area                   |                             |                |                             |               |                               |                |                             |               |                               |                |                             |               |                               |                |
| Metropolis                         |                             | 881<br>(45.4)  |                             | 335<br>(51.6) |                               | 546<br>(42.1)  |                             | 472<br>(51.2) |                               | 409<br>(40.0)  |                             | 380<br>(51.6) |                               | 501<br>(41.2)  |

|                                                  |        |        |        |        |        |        |        |
|--------------------------------------------------|--------|--------|--------|--------|--------|--------|--------|
| Small town                                       | 664    | 252    | 412    | 337    | 327    | 288    | 376    |
|                                                  | (33.3) | (36.5) | (31.6) | (36.3) | (30.6) | (36.4) | (31.3) |
| Rural                                            | 625    | 109    | 516    | 155    | 470    | 118    | 507    |
|                                                  | (21.3) | (11.9) | (26.3) | (12.5) | (29.4) | (12.0) | (27.5) |
| Body mass index<br>(below 25 kg/m <sup>2</sup> ) | 1662   | 522    | 1140   | 727    | 935    | 589    | 1073   |
|                                                  | (75.9) | (73.3) | (77.2) | (74.9) | (76.8) | (74.1) | (77.1) |
| Smoking status                                   |        |        |        |        |        |        |        |
| Non-smoker                                       | 1331   | 414    | 917    | 602    | 729    | 472    | 859    |
|                                                  | (57.9) | (59.0) | (57.3) | (60.8) | (55.3) | (58.2) | (57.7) |
| Ex-smoker                                        | 256    | 101    | 155    | 119    | 137    | 102    | 154    |
|                                                  | (12.0) | (13.8) | (11.1) | (11.5) | (12.5) | (12.5) | (11.7) |
| Current smoker                                   | 583    | 181    | 402    | 243    | 340    | 212    | 371    |
|                                                  | (30.1) | (27.2) | (31.6) | (27.7) | (32.2) | (29.3) | (30.6) |
| Risky drinker <sup>b</sup> (no)                  | 1888   | 598    | 1290   | 847    | 1041   | 685    | 1203   |
|                                                  | (86.1) | (85.1) | (86.6) | (87.1) | (85.1) | (86.4) | (85.8) |
| Physical activity <sup>c</sup><br>(sufficient)   | 781    | 367    | 414    | 471    | 310    | 415    | 366    |
|                                                  | (38.7) | (53.8) | (30.7) | (49.9) | (28.4) | (52.5) | (29.5) |
| Hypertension <sup>d</sup> (no)                   | 1778   | 560    | 1218   | 787    | 991    | 641    | 1137   |
|                                                  | (83.2) | (81.8) | (84.0) | (83.1) | (83.3) | (83.1) | (83.3) |
| Diabetes <sup>d</sup> (no)                       | 1995   | 629    | 1366   | 871    | 1124   | 716    | 1279   |
|                                                  | (93.0) | (90.9) | (94.0) | (91.6) | (94.2) | (92.5) | (93.3) |
| Depressive symptoms <sup>e</sup><br>(no)         | 2085   | 683    | 1402   | 937    | 1148   | 769    | 1316   |
|                                                  | (96.8) | (98.3) | (96.0) | (97.6) | (96.1) | (97.8) | (96.2) |
| Weekly work hours                                | 49.9   | 47.1   | 51.4   | 48.3   | 51.4   | 48.6   | 50.8   |
|                                                  | (16.9) | (15.3) | (17.5) | (15.3) | (18.2) | (14.8) | (18.2) |
| Employment status                                |        |        |        |        |        |        |        |
| Permanent worker                                 | 675    | 318    | 357    | 444    | 231    | 381    | 294    |

|                                              |        |        |        |        |        |        |        |
|----------------------------------------------|--------|--------|--------|--------|--------|--------|--------|
|                                              | (35.6) | (51.7) | (27.1) | (51.7) | (21.0) | (53.3) | (23.8) |
| Temporary worker                             | 127    | 35     | 92     | 56     | 71     | 38     | 89     |
|                                              | (5.9)  | (4.3)  | (6.8)  | (5.1)  | (6.7)  | (4.4)  | (7.0)  |
| Day laborer                                  | 179    | 19     | 160    | 45     | 134    | 25     | 154    |
|                                              | (8.4)  | (2.1)  | (11.6) | (3.7)  | (12.6) | (2.6)  | (12.2) |
| Self-employed worker                         | 979    | 281    | 698    | 369    | 610    | 309    | 670    |
|                                              | (42.9) | (36.9) | (46.1) | (35.5) | (49.6) | (36.5) | (47.1) |
| Unpaid family worker                         | 210    | 43     | 167    | 50     | 160    | 33     | 177    |
|                                              | (7.2)  | (5.0)  | (8.4)  | (4.0)  | (10.1) | (3.2)  | (9.9)  |
| Occupation <sup>f</sup>                      |        |        |        |        |        |        |        |
| Managers                                     | 85     | 59     | 26     | 77     | 8      | 69     | 16     |
|                                              | (4.9)  | (9.4)  | (2.5)  | (9.2)  | (1.0)  | (9.2)  | (2.0)  |
| Professionals and related workers            | 103    | 75     | 28     | 84     | 19     | 79     | 24     |
|                                              | (5.4)  | (11.7) | (2.1)  | (9.6)  | (1.6)  | (10.5) | (2.0)  |
| Clerks                                       | 170    | 119    | 51     | 134    | 36     | 123    | 47     |
|                                              | (9.5)  | (17.9) | (5.1)  | (15.5) | (4.0)  | (16.8) | (4.7)  |
| Service workers                              | 235    | 52     | 183    | 111    | 124    | 64     | 171    |
|                                              | (10.2) | (6.4)  | (12.3) | (9.9)  | (10.5) | (7.7)  | (11.9) |
| Sales workers                                | 263    | 101    | 162    | 103    | 160    | 95     | 168    |
|                                              | (12.9) | (13.8) | (12.4) | (9.8)  | (15.8) | (10.7) | (14.4) |
| Skilled agricultural, forestry, and fishery  | 342    | 14     | 328    | 21     | 321    | 9      | 333    |
|                                              | (10.2) | (1.3)  | (14.9) | (1.5)  | (18.2) | (0.7)  | (16.6) |
| Craft and related trades workers             | 197    | 44     | 153    | 58     | 139    | 38     | 159    |
|                                              | (10.3) | (6.0)  | (12.5) | (5.7)  | (14.4) | (5.0)  | (13.8) |
| Equipment, machine operating, and assembling | 218    | 66     | 152    | 136    | 82     | 112    | 106    |
|                                              | (10.3) | (8.7)  | (11.1) | (13.4) | (7.5)  | (13.6) | (8.1)  |

|                    |               |              |               |               |               |               |               |
|--------------------|---------------|--------------|---------------|---------------|---------------|---------------|---------------|
| Elementary workers | 404<br>(18.2) | 90<br>(10.6) | 314<br>(22.2) | 154<br>(13.7) | 250<br>(22.2) | 110<br>(11.9) | 294<br>(22.3) |
| Unspecified        | 153<br>(8.1)  | 76<br>(14.2) | 77<br>(4.9)   | 86<br>(11.7)  | 67<br>(4.8)   | 87<br>(13.9)  | 66<br>(4.2)   |

PS, physical strength; LH, lifting heavy objects; BK, bending, kneeling, or squatting; SD, standard deviation

All values, except the number of participants by category, were weighted estimates considering a complex sampling design.

<sup>a</sup>For simplicity, each physical job demand was dichotomized as low (never and sometimes) and high (often and always).

<sup>b</sup>High-risk drinkers were defined as individuals who consumed alcohol twice or more per week, based on the Korea National Health and Nutrition Examination Survey criteria.

<sup>c</sup>Insufficient physical activity was defined as less than 150 minutes per week based on the World Health Organization guidelines.

<sup>d</sup>Hypertension or diabetes cases were defined as those diagnosed with hypertension or diabetes by a physician.

<sup>e</sup>Depressive symptoms were defined as a score of four or above on the 10-item Center for Epidemiologic Studies Depression Scale.

<sup>f</sup>Based on the Korean Standard Classification of Occupations

Supplementary table 2. Weighted Prevalence of Cognitive Impairment Among Study Participants by Physical Job Demands During the Study Period

| Physical job demands               | Weighted prevalence of cognitive impairment (%) |                  |                  |                  |                  |                  |                  |                  | Overall |
|------------------------------------|-------------------------------------------------|------------------|------------------|------------------|------------------|------------------|------------------|------------------|---------|
|                                    | Wave 1<br>(2006)                                | Wave 2<br>(2008) | Wave 3<br>(2010) | Wave 4<br>(2012) | Wave 5<br>(2014) | Wave 6<br>(2016) | Wave 7<br>(2018) | Wave 8<br>(2020) |         |
| Overall                            | 6.9                                             | 7.2              | 8.2              | 6.6              | 9.5              | 8.2              | 12.5             | 12.2             | 8.6     |
| Physical strength                  |                                                 |                  |                  |                  |                  |                  |                  |                  |         |
| Never                              | 3.1                                             | 4.7              | 10.4             | 5.8              | 6.5              | 10.9             | 4.1              | 5.5              | 6.4     |
| Sometimes                          | 2.3                                             | 7.0              | 5.7              | 4.5              | 6.6              | 4.2              | 11.1             | 12.7             | 6.4     |
| Often                              | 8.5                                             | 6.4              | 8.1              | 6.0              | 10.7             | 7.7              | 13.8             | 12.4             | 8.9     |
| Always                             | 10.4                                            | 10.1             | 11.1             | 11.5             | 13.2             | 14.8             | 14.4             | 13.6             | 11.9    |
| Lifting heavy objects              |                                                 |                  |                  |                  |                  |                  |                  |                  |         |
| Never                              | 3.0                                             | 3.1              | 6.3              | 3.2              | 5.6              | 3.9              | 3.1              | 1.8              | 3.8     |
| Sometimes                          | 3.9                                             | 6.7              | 4.8              | 5.2              | 6.4              | 4.0              | 11.4             | 12.7             | 6.4     |
| Often                              | 9.2                                             | 7.9              | 9.9              | 6.8              | 11.5             | 9.7              | 14.3             | 12.7             | 10.0    |
| Always                             | 10.7                                            | 10.1             | 12.4             | 11.1             | 14.8             | 16.9             | 15.3             | 16.4             | 12.8    |
| Bending, kneeling, or<br>squatting |                                                 |                  |                  |                  |                  |                  |                  |                  |         |
| Never                              | 2.9                                             | 0.8              | 6.0              | 5.2              | 4.5              | 5.4              | 2.1              | 2.1              | 3.6     |
| Sometimes                          | 2.4                                             | 6.2              | 5.2              | 5.0              | 6.0              | 2.9              | 8.1              | 13.2             | 5.7     |

|        |      |      |      |      |      |      |      |      |      |
|--------|------|------|------|------|------|------|------|------|------|
| Often  | 7.6  | 7.8  | 8.6  | 5.8  | 12.1 | 8.9  | 14.6 | 13.1 | 9.5  |
| Always | 13.2 | 11.1 | 14.2 | 12.6 | 12.6 | 17.7 | 20.1 | 12.6 | 13.9 |

Supplementary table 3. Weighted Distribution of Study Participants Across Levels of Each Physical Job Demand by Wave

| Physical job demands            | Distribution (weighted %) of respondents |                           |                           |                           |                           |                           |                           |                           |                             |
|---------------------------------|------------------------------------------|---------------------------|---------------------------|---------------------------|---------------------------|---------------------------|---------------------------|---------------------------|-----------------------------|
|                                 | Wave 1 ( <i>n</i> = 2170)                | Wave 2 ( <i>n</i> = 1971) | Wave 3 ( <i>n</i> = 1844) | Wave 4 ( <i>n</i> = 1686) | Wave 5 ( <i>n</i> = 1588) | Wave 6 ( <i>n</i> = 1444) | Wave 7 ( <i>n</i> = 1112) | Wave 8 ( <i>n</i> = 1114) | Overall ( <i>n</i> = 12929) |
| Physical strength               |                                          |                           |                           |                           |                           |                           |                           |                           |                             |
| Never                           | 7.5                                      | 9.7                       | 9.0                       | 6.9                       | 5.5                       | 7.3                       | 6.7                       | 6.7                       | 7.5                         |
| Sometimes                       | 27.0                                     | 26.0                      | 26.6                      | 27.9                      | 31.1                      | 29.3                      | 28.3                      | 32.0                      | 28.3                        |
| Often                           | 39.5                                     | 42.4                      | 45.4                      | 45.9                      | 48.8                      | 45.5                      | 47.2                      | 45.7                      | 44.7                        |
| Always                          | 26.0                                     | 21.9                      | 19.0                      | 19.3                      | 14.6                      | 17.9                      | 17.8                      | 15.6                      | 19.5                        |
| Lifting heavy objects           |                                          |                           |                           |                           |                           |                           |                           |                           |                             |
| Never                           | 11.1                                     | 13.9                      | 11.1                      | 8.5                       | 8.8                       | 9.0                       | 9.1                       | 9.4                       | 10.3                        |
| Sometimes                       | 36.5                                     | 34.1                      | 32.9                      | 35.4                      | 35.9                      | 36.1                      | 32.2                      | 36.0                      | 35.0                        |
| Often                           | 31.2                                     | 34.3                      | 39.9                      | 39.9                      | 43.4                      | 39.9                      | 42.9                      | 40.1                      | 38.4                        |
| Always                          | 21.2                                     | 17.7                      | 16.1                      | 16.2                      | 11.9                      | 15.0                      | 15.8                      | 14.5                      | 16.3                        |
| Bending, kneeling, or squatting |                                          |                           |                           |                           |                           |                           |                           |                           |                             |
| Never                           | 8.6                                      | 10.0                      | 9.8                       | 6.6                       | 7.6                       | 7.2                       | 7.9                       | 7.4                       | 8.3                         |
| Sometimes                       | 31.3                                     | 32.2                      | 30.9                      | 32.8                      | 33.5                      | 31.5                      | 30.8                      | 31.8                      | 31.9                        |
| Often                           | 36.9                                     | 38.9                      | 43.2                      | 43.8                      | 46.4                      | 45.0                      | 45.6                      | 42.7                      | 42.4                        |

|        |      |      |      |      |      |      |      |      |      |
|--------|------|------|------|------|------|------|------|------|------|
| Always | 23.2 | 18.9 | 16.1 | 16.8 | 12.5 | 16.3 | 15.7 | 18.1 | 17.4 |
|--------|------|------|------|------|------|------|------|------|------|



Supplementary table 4. Results of Models<sup>a</sup> Fitted with an Interaction Term Between Physical Strength and Potential Effect Modifiers

| Subgroup                   | Physical job demands (physical strength) |        |           |           |       |           |        |           | p-value<br>for<br>interaction |
|----------------------------|------------------------------------------|--------|-----------|-----------|-------|-----------|--------|-----------|-------------------------------|
|                            | Never                                    |        | Sometimes |           | Often |           | Always |           |                               |
|                            | OR                                       | 95% CI | OR        | 95% CI    | OR    | 95% CI    | OR     | 95% CI    |                               |
| Overall                    | Ref                                      |        | 0.48      | 0.27–0.88 | 0.40  | 0.21–0.75 | 0.31   | 0.14–0.68 |                               |
| Sex                        |                                          |        |           |           |       |           |        |           | 0.388                         |
| Male                       | Ref                                      |        | 0.47      | 0.24–0.95 | 0.44  | 0.21–0.91 | 0.31   | 0.12–0.78 |                               |
| Female                     | Ref                                      |        | 0.51      | 0.20–1.29 | 0.33  | 0.13–0.83 | 0.30   | 0.12–0.80 |                               |
| Educational attainment     |                                          |        |           |           |       |           |        |           | 0.206                         |
| Elementary school or below | Ref                                      |        | 0.92      | 0.34–2.52 | 0.71  | 0.27–1.90 | 0.65   | 0.23–1.85 |                               |
| Middle school              | Ref                                      |        | 0.49      | 0.20–1.22 | 0.29  | 0.13–0.65 | 0.21   | 0.08–0.55 |                               |
| High school                | Ref                                      |        | 0.30      | 0.12–0.73 | 0.28  | 0.11–0.72 | 0.19   | 0.05–0.67 |                               |
| College or above           | Ref                                      |        | 0.89      | 0.13–5.96 | 1.46  | 0.22–9.77 | 0.74   | 0.07–8.34 |                               |
| Household income           |                                          |        |           |           |       |           |        |           | 0.344                         |
| Below median               | Ref                                      |        | 0.77      | 0.33–1.80 | 0.71  | 0.30–1.66 | 0.51   | 0.20–1.31 |                               |
| Above median               | Ref                                      |        | 0.40      | 0.20–0.80 | 0.31  | 0.15–0.63 | 0.26   | 0.11–0.62 |                               |
| Body mass index            |                                          |        |           |           |       |           |        |           | 0.833                         |
| Below 25 kg/m <sup>2</sup> | Ref                                      |        | 0.53      | 0.27–1.05 | 0.43  | 0.21–0.89 | 0.35   | 0.15–0.86 |                               |

|                                  |     |      |           |      |           |      |           |       |
|----------------------------------|-----|------|-----------|------|-----------|------|-----------|-------|
| Above 25 kg/m <sup>2</sup>       | Ref | 0.36 | 0.13–1.04 | 0.30 | 0.11–0.81 | 0.21 | 0.07–0.63 |       |
| Smoking status                   |     |      |           |      |           |      |           | 0.115 |
| Non-smoker                       | Ref | 0.59 | 0.28–1.23 | 0.41 | 0.20–0.86 | 0.34 | 0.15–0.78 |       |
| Ex-smoker                        | Ref | 0.48 | 0.15–1.52 | 0.43 | 0.15–1.28 | 0.21 | 0.06–0.69 |       |
| Current smoker                   | Ref | 0.27 | 0.10–0.75 | 0.33 | 0.10–1.10 | 0.34 | 0.08–1.54 |       |
| Physical activity <sup>b</sup>   |     |      |           |      |           |      |           | 0.942 |
| Sufficient                       | Ref | 0.47 | 0.19–1.14 | 0.42 | 0.18–0.98 | 0.36 | 0.13–0.96 |       |
| Insufficient                     | Ref | 0.49 | 0.24–1.01 | 0.39 | 0.18–0.81 | 0.30 | 0.12–0.73 |       |
| Hypertension <sup>c</sup>        |     |      |           |      |           |      |           | 0.893 |
| No                               | Ref | 0.44 | 0.22–0.87 | 0.38 | 0.19–0.77 | 0.31 | 0.14–0.71 |       |
| Yes                              | Ref | 0.58 | 0.19–1.73 | 0.44 | 0.15–1.27 | 0.32 | 0.10–1.06 |       |
| Diabetes <sup>c</sup>            |     |      |           |      |           |      |           | 0.353 |
| No                               | Ref | 0.51 | 0.27–0.94 | 0.39 | 0.20–0.74 | 0.32 | 0.14–0.72 |       |
| Yes                              | Ref | 0.36 | 0.09–1.36 | 0.44 | 0.12–1.68 | 0.26 | 0.06–1.04 |       |
| Depressive symptoms <sup>d</sup> |     |      |           |      |           |      |           | 0.061 |
| No                               | Ref | 0.41 | 0.22–0.77 | 0.35 | 0.18–0.67 | 0.30 | 0.14–0.64 |       |
| Yes                              | Ref | 1.29 | 0.39–4.31 | 0.83 | 0.29–2.39 | 0.35 | 0.10–1.31 |       |
| Employment status                |     |      |           |      |           |      |           | 0.309 |

|                      |     |      |           |      |           |      |           |
|----------------------|-----|------|-----------|------|-----------|------|-----------|
| Permanent worker     | Ref | 1.14 | 0.47–2.74 | 0.65 | 0.27–1.57 | 0.58 | 0.22–1.57 |
| Temporary worker     | Ref | 0.41 | 0.11–1.49 | 0.22 | 0.06–0.77 | 0.24 | 0.05–1.12 |
| Day laborer          | Ref | 0.16 | 0.04–0.71 | 0.18 | 0.04–0.73 | 0.09 | 0.02–0.41 |
| Self-employed worker | Ref | 0.39 | 0.15–1.04 | 0.43 | 0.17–1.10 | 0.35 | 0.12–0.98 |
| Unpaid family worker | Ref | 0.33 | 0.03–4.24 | 0.34 | 0.03–4.25 | 0.32 | 0.02–4.30 |

OR, odds ratio; CI, confidence interval; Ref, reference.

<sup>a</sup>Adjusted for sociodemographic, health-related, occupational characteristics, and other physical job demands.

<sup>b</sup>Insufficient physical activity was defined as less than 150 min per week based on the World Health Organization guidelines.

<sup>c</sup>Hypertension or diabetes cases were defined as those diagnosed with hypertension or diabetes by a physician.

<sup>d</sup>Depressive symptoms were defined as a score of four or above on the 10-item Center for Epidemiologic Studies Depression Scale.

Supplementary table 5. Results of Models<sup>a</sup> Fitted with an Interaction Term Between Lifting Heavy Objects and Potential Effect Modifiers

| Subgroup                   | Physical job demands (lifting heavy objects) |        |           |            |       |            |        |            | p-value<br>for<br>interaction |
|----------------------------|----------------------------------------------|--------|-----------|------------|-------|------------|--------|------------|-------------------------------|
|                            | Never                                        |        | Sometimes |            | Often |            | Always |            |                               |
|                            | OR                                           | 95% CI | OR        | 95% CI     | OR    | 95% CI     | OR     | 95% CI     |                               |
| Overall                    | Ref                                          |        | 2.01      | 1.17–3.46  | 2.29  | 1.30–4.06  | 2.67   | 1.36–5.26  |                               |
| Sex                        |                                              |        |           |            |       |            |        |            | 0.997                         |
| Male                       | Ref                                          |        | 1.95      | 1.01–3.76  | 2.20  | 1.09–4.44  | 2.55   | 1.14–5.75  |                               |
| Female                     | Ref                                          |        | 2.13      | 0.97–4.68  | 2.45  | 1.12–5.36  | 2.88   | 1.20–6.92  |                               |
| Educational attainment     |                                              |        |           |            |       |            |        |            | 0.128                         |
| Elementary school or below | Ref                                          |        | 1.63      | 0.72–3.69  | 2.15  | 0.95–4.86  | 2.65   | 1.06–6.62  |                               |
| Middle school              | Ref                                          |        | 5.50      | 1.68–18.00 | 4.40  | 1.32–14.66 | 6.48   | 1.72–24.47 |                               |
| High school                | Ref                                          |        | 1.34      | 0.62–2.94  | 1.37  | 0.60–3.11  | 1.25   | 0.46–3.40  |                               |
| College or above           | Ref                                          |        | 2.55      | 0.48–13.37 | 7.25  | 1.30–40.27 | 3.19   | 0.25–40.50 |                               |
| Household income           |                                              |        |           |            |       |            |        |            | 0.162                         |
| Below median               | Ref                                          |        | 2.83      | 1.29–6.21  | 3.84  | 1.74–8.48  | 3.69   | 1.55–8.81  |                               |
| Above median               | Ref                                          |        | 1.66      | 0.88–3.14  | 1.68  | 0.86–3.30  | 2.35   | 1.06–5.19  |                               |
| Body mass index            |                                              |        |           |            |       |            |        |            | 0.379                         |

|                                  |     |      |           |      |           |      |            |       |
|----------------------------------|-----|------|-----------|------|-----------|------|------------|-------|
| Below 25 kg/m <sup>2</sup>       | Ref | 2.50 | 1.31–4.80 | 2.71 | 1.39–5.29 | 3.03 | 1.41–6.52  |       |
| Above 25 kg/m <sup>2</sup>       | Ref | 1.13 | 0.49–2.62 | 1.51 | 0.65–3.51 | 2.02 | 0.75–5.43  |       |
| Smoking status                   |     |      |           |      |           |      |            | 0.460 |
| Non-smoker                       | Ref | 2.16 | 1.12–4.17 | 2.40 | 1.21–4.77 | 2.53 | 1.15–5.56  |       |
| Ex-smoker                        | Ref | 1.72 | 0.59–4.96 | 1.77 | 0.59–5.27 | 1.75 | 0.53–5.86  |       |
| Current smoker                   | Ref | 2.12 | 0.72–6.24 | 2.96 | 1.04–8.39 | 5.00 | 1.61–15.47 |       |
| Physical activity <sup>b</sup>   |     |      |           |      |           |      |            | 0.624 |
| Sufficient                       | Ref | 1.49 | 0.67–3.30 | 1.97 | 0.89–4.37 | 1.80 | 0.70–4.61  |       |
| Insufficient                     | Ref | 2.41 | 1.21–4.79 | 2.62 | 1.32–5.21 | 3.20 | 1.45–7.07  |       |
| Hypertension <sup>c</sup>        |     |      |           |      |           |      |            | 0.459 |
| No                               | Ref | 2.67 | 1.39–5.13 | 3.21 | 1.63–6.35 | 3.63 | 1.66–7.93  |       |
| Yes                              | Ref | 1.42 | 0.64–3.17 | 1.46 | 0.64–3.32 | 1.80 | 0.70–4.61  |       |
| Diabetes <sup>c</sup>            |     |      |           |      |           |      |            | 0.303 |
| No                               | Ref | 2.17 | 1.22–3.86 | 2.29 | 1.25–4.19 | 2.79 | 1.38–5.65  |       |
| Yes                              | Ref | 1.34 | 0.52–3.45 | 2.40 | 0.88–6.55 | 2.16 | 0.66–7.06  |       |
| Depressive symptoms <sup>d</sup> |     |      |           |      |           |      |            | 0.142 |
| No                               | Ref | 1.67 | 0.99–2.83 | 1.99 | 1.14–3.50 | 2.35 | 1.19–4.65  |       |
| Yes                              | Ref | 9.60 | 2.10–     | 7.59 | 1.74–     | 8.24 | 1.75–      |       |

|                      |     |      |            |      |            |      |            |       |
|----------------------|-----|------|------------|------|------------|------|------------|-------|
|                      |     |      | 43.86      |      | 33.09      |      | 38.86      |       |
| Employment status    |     |      |            |      |            |      |            | 0.314 |
| Permanent worker     | Ref | 3.54 | 1.53–8.16  | 2.89 | 1.20–6.98  | 4.49 | 1.62–12.47 |       |
| Temporary worker     | Ref | 1.26 | 0.35–4.60  | 1.27 | 0.37–4.39  | 2.71 | 0.61–12.13 |       |
| Day laborer          | Ref | 3.50 | 0.91–13.45 | 2.52 | 0.66–9.57  | 2.20 | 0.51–9.53  |       |
| Self-employed worker | Ref | 1.51 | 0.69–3.30  | 2.26 | 1.00–5.14  | 2.42 | 0.93–6.26  |       |
| Unpaid family worker | Ref | 1.16 | 0.22–6.05  | 1.85 | 0.32–10.74 | 1.80 | 0.29–11.02 |       |

OR, odds ratio; CI, confidence interval; Ref, reference.

<sup>a</sup>Adjusted for sociodemographic, health-related, occupational characteristics, and other physical job demands.

<sup>b</sup>Insufficient physical activity was defined as less than 150 min per week based on the World Health Organization guidelines.

<sup>c</sup>Hypertension or diabetes cases were defined as those diagnosed with hypertension or diabetes by a physician.

<sup>d</sup>Depressive symptoms were defined as a score of four or above on the 10-item Center for Epidemiologic Studies Depression Scale.

Supplementary table 6. Results of Models<sup>a</sup> Fitted with an Interaction Term Between Bending, Kneeling, or Squatting and Potential Effect Modifiers

| Subgroup                   | Physical job demands (bending, kneeling, or squatting) |        |           |            |       |            |        |            | p-value<br>for<br>interaction |
|----------------------------|--------------------------------------------------------|--------|-----------|------------|-------|------------|--------|------------|-------------------------------|
|                            | Never                                                  |        | Sometimes |            | Often |            | Always |            |                               |
|                            | OR                                                     | 95% CI | OR        | 95% CI     | OR    | 95% CI     | OR     | 95% CI     |                               |
| Overall                    | Ref                                                    |        | 1.25      | 0.68–2.32  | 1.43  | 0.75–2.73  | 1.69   | 0.82–3.47  |                               |
| Sex                        |                                                        |        |           |            |       |            |        |            | 0.784                         |
| Male                       | Ref                                                    |        | 1.19      | 0.58–2.46  | 1.52  | 0.73–3.16  | 1.79   | 0.77–4.14  |                               |
| Female                     | Ref                                                    |        | 1.34      | 0.51–3.50  | 1.26  | 0.47–3.42  | 1.50   | 0.53–4.23  |                               |
| Educational attainment     |                                                        |        |           |            |       |            |        |            | 0.718                         |
| Elementary school or below | Ref                                                    |        | 1.00      | 0.36–2.77  | 1.42  | 0.50–4.06  | 1.68   | 0.55–5.12  |                               |
| Middle school              | Ref                                                    |        | 3.78      | 0.97–14.71 | 3.50  | 0.93–13.14 | 4.70   | 1.08–20.50 |                               |
| High school                | Ref                                                    |        | 0.91      | 0.39–2.15  | 0.93  | 0.38–2.27  | 1.03   | 0.37–2.90  |                               |
| College or above           | Ref                                                    |        | 1.60      | 0.31–8.19  | 2.53  | 0.48–13.38 | 1.42   | 0.13–16.12 |                               |
| Household income           |                                                        |        |           |            |       |            |        |            | 0.631                         |
| Below median               | Ref                                                    |        | 1.40      | 0.52–3.73  | 1.92  | 0.73–5.06  | 2.18   | 0.77–6.14  |                               |
| Above median               | Ref                                                    |        | 1.21      | 0.59–2.46  | 1.26  | 0.60–2.62  | 1.52   | 0.67–3.48  |                               |

|                                  |     |      |           |      |            |      |            |
|----------------------------------|-----|------|-----------|------|------------|------|------------|
| Body mass index                  |     |      |           |      |            |      | 0.155      |
| Below 25 kg/m <sup>2</sup>       | Ref | 1.74 | 0.85–3.55 | 1.72 | 0.81–3.65  | 2.07 | 0.91–4.69  |
| Above 25 kg/m <sup>2</sup>       | Ref | 0.50 | 0.18–1.41 | 0.86 | 0.33–2.21  | 0.95 | 0.34–2.69  |
| Smoking status                   |     |      |           |      |            |      | 0.060      |
| Non-smoker                       | Ref | 1.50 | 0.66–3.42 | 1.51 | 0.64–3.55  | 1.56 | 0.64–3.79  |
| Ex-smoker                        | Ref | 0.94 | 0.31–2.87 | 1.05 | 0.34–3.19  | 0.93 | 0.27–3.12  |
| Current smoker                   | Ref | 1.14 | 0.37–3.55 | 1.98 | 0.67–5.87  | 4.23 | 1.26–14.18 |
| Physical activity <sup>b</sup>   |     |      |           |      |            |      | 0.824      |
| Sufficient                       | Ref | 1.18 | 0.48–2.88 | 1.22 | 0.50–2.95  | 1.76 | 0.65–4.77  |
| Insufficient                     | Ref | 1.30 | 0.60–2.84 | 1.53 | 0.70–3.35  | 1.72 | 0.74–4.02  |
| Hypertension <sup>c</sup>        |     |      |           |      |            |      | 0.798      |
| No                               | Ref | 1.53 | 0.73–3.23 | 1.65 | 0.76–3.59  | 1.98 | 0.85–4.65  |
| Yes                              | Ref | 0.88 | 0.33–2.35 | 1.12 | 0.42–3.00  | 1.27 | 0.45–3.59  |
| Diabetes <sup>c</sup>            |     |      |           |      |            |      | 0.148      |
| No                               | Ref | 1.18 | 0.61–2.28 | 1.25 | 0.62–2.52  | 1.56 | 0.73–3.36  |
| Yes                              | Ref | 2.05 | 0.66–6.36 | 3.63 | 1.29–10.22 | 2.86 | 0.76–10.71 |
| Depressive symptoms <sup>d</sup> |     |      |           |      |            |      | 0.992      |



|                      |     |      |            |      |            |      |            |
|----------------------|-----|------|------------|------|------------|------|------------|
| No                   | Ref | 1.23 | 0.65–2.34  | 1.40 | 0.72–2.73  | 1.65 | 0.79–3.43  |
| Yes                  | Ref | 1.42 | 0.33–6.11  | 1.71 | 0.45–6.44  | 1.99 | 0.45–8.79  |
| Employment status    |     |      |            |      |            |      | 0.459      |
| Permanent worker     | Ref | 1.30 | 0.52–3.26  | 0.93 | 0.36–2.41  | 1.69 | 0.59–4.84  |
| Temporary worker     | Ref | 0.83 | 0.19–3.67  | 1.31 | 0.32–5.37  | 2.38 | 0.48–11.77 |
| Day laborer          | Ref | 1.32 | 0.29–5.98  | 1.66 | 0.40–6.96  | 1.62 | 0.34–7.87  |
| Self-employed worker | Ref | 1.16 | 0.43–3.08  | 1.57 | 0.57–4.32  | 1.73 | 0.59–5.06  |
| Unpaid family worker | Ref | 2.43 | 0.48–12.24 | 3.43 | 0.82–14.45 | 2.58 | 0.59–11.37 |

OR, odds ratio; CI, confidence interval; Ref, reference.

- <sup>a</sup>Adjusted for sociodemographic, health-related, occupational characteristics, and other physical job demands.
- <sup>b</sup>Insufficient physical activity was defined as less than 150 min per week based on the World Health Organization guidelines.
- <sup>c</sup>Hypertension or diabetes cases were defined as those diagnosed with hypertension or diabetes by a physician.
- <sup>d</sup>Depressive symptoms were defined as a score of four or above on the 10-item Center for Epidemiologic Studies Depression Scale.

Supplementary table 7. Longitudinal Associations Between Physical Job Demands and Cognitive Impairment: Incorporating Time-Lagged

Variables and Changes

| Physical job demands            | Total |            |                      |            |          |           | Male  |           |         |            |          |           | Female |            |         |            |          |             |
|---------------------------------|-------|------------|----------------------|------------|----------|-----------|-------|-----------|---------|------------|----------|-----------|--------|------------|---------|------------|----------|-------------|
|                                 | Total |            | Low EDU <sup>a</sup> |            | High EDU |           | Total |           | Low EDU |            | High EDU |           | Total  |            | Low EDU |            | High EDU |             |
|                                 | OR    | 95%CI      | OR                   | 95%CI      | OR       | 95%CI     | OR    | 95%CI     | OR      | 95%CI      | OR       | 95%CI     | OR     | 95%CI      | OR      | 95%CI      | OR       | 95%CI       |
| Physical strength               |       |            |                      |            |          |           |       |           |         |            |          |           |        |            |         |            |          |             |
| Never                           | Ref   |            | Ref                  |            | Ref      |           | Ref   |           | Ref     |            | Ref      |           | Ref    |            | Ref     |            | Ref      |             |
| Sometimes                       | 0.67  | 0.37–1.21  | 0.55                 | 0.23–1.28  | 0.81     | 0.35–1.85 | 0.55  | 0.27–1.10 | 0.35    | 0.13–0.96  | 0.75     | 0.29–1.92 | 1.10   | 0.33–3.59  | 1.29    | 0.20–8.53  | 0.55     | 0.13–2.35   |
| Often                           | 0.57  | 0.27–1.21  | 0.34                 | 0.13–0.92  | 1.04     | 0.33–3.26 | 0.48  | 0.20–1.18 | 0.21    | 0.06–0.71  | 1.02     | 0.30–3.48 | 0.90   | 0.22–3.75  | 0.95    | 0.13–6.75  | 0.55     | 0.05–6.01   |
| Always                          | 0.39  | 0.15–1.06  | 0.22                 | 0.07–0.69  | 0.99     | 0.19–5.08 | 0.35  | 0.10–1.23 | 0.11    | 0.02–0.52  | 1.28     | 0.21–7.88 | 0.64   | 0.13–3.14  | 0.82    | 0.11–5.96  | 0.18     | 0.01–2.99   |
| The change in physical strength | 0.73  | 0.56–0.95  | 0.69                 | 0.53–0.91  | 0.80     | 0.49–1.32 | 0.69  | 0.49–0.97 | 0.58    | 0.40–0.83  | 0.83     | 0.47–1.46 | 0.80   | 0.56–1.15  | 0.86    | 0.58–1.27  | 0.64     | 0.25–1.64   |
| Lifting heavy objects           |       |            |                      |            |          |           |       |           |         |            |          |           |        |            |         |            |          |             |
| Never                           | Ref   |            | Ref                  |            | Ref      |           | Ref   |           | Ref     |            | Ref      |           | Ref    |            | Ref     |            | Ref      |             |
| Sometimes                       | 2.28  | 1.27–4.11  | 1.92                 | 0.82–4.51  | 2.26     | 1.02–5.00 | 1.70  | 0.86–3.37 | 1.61    | 0.55–4.69  | 1.59     | 0.68–3.76 | 4.58   | 1.28–16.43 | 3.28    | 0.63–16.99 | 11.30    | 2.65–48.17  |
| Often                           | 3.00  | 1.46–6.14  | 2.76                 | 1.01–7.56  | 2.52     | 0.91–6.93 | 2.43  | 1.00–5.90 | 2.60    | 0.67–10.14 | 1.87     | 0.62–5.67 | 4.86   | 1.20–19.68 | 3.98    | 0.68–23.49 | 9.79     | 1.33–72.03  |
| Always                          | 4.32  | 1.76–10.58 | 5.37                 | 1.64–17.56 | 1.95     | 0.48–7.88 | 2.92  | 0.91–9.37 | 4.73    | 0.84–26.58 | 1.29     | 0.28–6.03 | 9.25   | 1.89–45.13 | 8.81    | 1.22–63.52 | 11.58    | 0.93–143.67 |
| The change in                   | 1.20  | 0.96–      | 1.35                 | 1.01–      | 0.99     | 0.71–     | 1.18  | 0.87–     | 1.38    | 0.87–      | 0.99     | 0.68–     | 1.19   | 0.87–      | 1.30    | 0.91–      | 0.92     | 0.46–       |

|                                               |      |           |      |           |      |           |      |           |      |            |      |           |      |           |      |            |      |           |
|-----------------------------------------------|------|-----------|------|-----------|------|-----------|------|-----------|------|------------|------|-----------|------|-----------|------|------------|------|-----------|
| lifting heavy objects                         |      | 1.49      |      | 1.80      |      | 1.37      |      | 1.58      |      | 2.16       |      | 1.42      |      | 1.63      |      | 1.86       |      | 1.86      |
| Bending, kneeling, or squatting               |      |           |      |           |      |           |      |           |      |            |      |           |      |           |      |            |      |           |
| Never                                         | Ref  |            | Ref  |           | Ref  |           | Ref  |            | Ref  |           |
| Sometimes                                     | 0.70 | 0.35–1.40 | 1.24 | 0.46–3.36 | 0.52 | 0.21–1.30 | 0.80 | 0.36–1.76 | 0.92 | 0.28–3.05  | 0.71 | 0.26–1.93 | 0.66 | 0.13–3.42 | 5.54 | 0.61–50.43 | 0.18 | 0.02–1.41 |
| Often                                         | 0.82 | 0.38–1.75 | 1.42 | 0.49–4.11 | 0.59 | 0.21–1.68 | 1.04 | 0.42–2.62 | 1.53 | 0.39–6.03  | 0.72 | 0.22–2.33 | 0.60 | 0.11–3.25 | 3.74 | 0.37–37.61 | 0.27 | 0.02–3.28 |
| Always                                        | 0.90 | 0.36–2.27 | 1.84 | 0.56–6.06 | 0.47 | 0.10–2.13 | 1.20 | 0.38–3.80 | 2.09 | 0.43–10.19 | 0.57 | 0.09–3.43 | 0.56 | 0.09–3.56 | 3.78 | 0.33–43.33 | 0.19 | 0.01–4.77 |
| The change in bending, kneeling, or squatting | 1.09 | 0.87–1.37 | 1.10 | 0.84–1.45 | 1.08 | 0.75–1.57 | 1.25 | 0.94–1.66 | 1.34 | 0.91–1.99  | 1.14 | 0.76–1.71 | 0.83 | 0.58–1.20 | 0.81 | 0.56–1.16  | 0.85 | 0.31–2.36 |

EDU, educational attainment; OR, odds ratio; CI, confidence interval; Ref, reference

Adjusted for sociodemographic, health-related, occupational characteristics, and other physical job demands.

<sup>a</sup>Educational attainment was dichotomized as low EDU (middle school or below) and high EDU (high school or above).
